# Supplementary material for: Synthesis of durene by methylation of 1,2,4-trimethylbenzene with syngas over bifunctional CuZnZrOx–HZSM-5 catalysts
Source: Royal Society of Chemistry journal article supplement (doi:10.1039/d2cy00037g), 2022-01-01
Supplement: d2cy00037g1.pdf [file d2cy00037g1.pdf]

## Supporting Information

### Synthesis of durene by methylation of 1,2,4-trimethylbenzene with syngas over bifunctional CuZnZrO<sub>x</sub>-HZSM-5 catalysts

Danlu Wen, Jiachang Zuo, Xiaoqin Han, Jia Liu, Linmin Ye, and Youzhu Yuan\*

*State Key Lab of Physical Chemistry of Solid Surfaces, National Engineering Lab for Green Chemical Productions of Alcohols-Ethers-Esters, Tan Kah Kee Innovation Laboratory, College of Chemistry and Chemical Engineering, Xiamen University, Xiamen 361005, Fujian, China.*

*\*Corresponding author. Tel: +86-592-2181659; Fax: +86-592-2183047; E-mail: yzyuan@xmu.edu.cn*

**Table S1.** Catalytic performance of 1,2,4-TriMB methylated with syngas in different ZZO and Z5 mass ratios.

| Mass ratio | Conv. (%) | Product selectivity (%)               |          |           |           |              |              |             |             |      |     |      |     |     |     |        |
|------------|-----------|---------------------------------------|----------|-----------|-----------|--------------|--------------|-------------|-------------|------|-----|------|-----|-----|-----|--------|
|            |           | Non-aromatic hydrocarbons             |          |           | Aromatics |              |              |             |             |      |     |      |     |     |     |        |
|            |           | C <sub>1</sub> -C <sub>5</sub> alkane | Ethylene | Propylene | Durene    | 1,2,3,5-TeMB | 1,2,3,4-TeMB | 1,3,5-TriMB | 1,2,3-TriMB | 4-ET | PX  | MX   | OX  | T   | B   | Others |
| 1/9        | 11.3      | 4.1                                   | 1.7      | 0.6       | 16.8      | 2.4          | 1.0          | 30.8        | 17.3        | 1.0  | 4.5 | 11.9 | 4.3 | 2.4 | 0.3 | 0.9    |
| 2/8        | 17.0      | 5.3                                   | 1.9      | 0.4       | 26.3      | 4.1          | 1.9          | 21.9        | 11.3        | 0.9  | 4.7 | 11.9 | 4.5 | 1.6 | 0.2 | 3.1    |
| 3/7        | 18.0      | 7.9                                   | 2.5      | 0.8       | 28.9      | 2.8          | 1.4          | 15.6        | 9.7         | 1.1  | 4.7 | 11.5 | 4.3 | 1.4 | 0.2 | 7.2    |
| 4/6        | 21.6      | 10.2                                  | 3.4      | 0.7       | 37.7      | 3.0          | 1.6          | 10.2        | 5.5         | 1.3  | 5.0 | 11.9 | 4.4 | 1.4 | 0.2 | 3.5    |
| 5/5        | 20.0      | 11.4                                  | 4.7      | 1.3       | 38.2      | 3.2          | 1.7          | 9.2         | 5.0         | 1.3  | 4.8 | 10.8 | 4.1 | 1.2 | 0.1 | 3.0    |

Catalyst: ZZO-Z5 (Zn/Zr molar ratio of 1/7, and Z5 SiO<sub>2</sub>/Al<sub>2</sub>O<sub>3</sub> ratio of 85). Reaction conditions: CO/H<sub>2</sub>/N<sub>2</sub> = 30/60/10, T = 320 °C, P = 3.0

MPa, GHSV = 12000 mL g<sup>-1</sup> h<sup>-1</sup>, and 1,2,4-TriMB vaporized at 110 °C. Conv.: 1,2,4-TriMB conversion; 4-ET: 4-ethyltoluene; PX: *para*-xylene;

MX: *meta*-xylene; OX: *ortho*-xylene; T: toluene; B: benzene; Others: other C<sub>11+</sub> aromatics.

**Table S2.** Relative concentration of CuZnZr catalysts analyzed by XRF.

| Sample  | Relative concentration of metal (wt%) |     |      |
|---------|---------------------------------------|-----|------|
|         | Cu                                    | Zn  | Zr   |
| 4CuZnZr | 4.4                                   | 8.9 | 86.7 |
| 5CuZnZr | 5.0                                   | 7.0 | 88.0 |
| 6CuZnZr | 5.8                                   | 4.4 | 89.8 |
| 7CuZnZr | 6.6                                   | 4.0 | 89.4 |

**Table S3.** Pore structures of Z5, ZZO and CuZZO catalysts.

| Catalyst | BET surface area    | Pore volume          |
|----------|---------------------|----------------------|
|          | (m <sup>2</sup> /g) | (cm <sup>3</sup> /g) |
| Z5       | 310                 | 0.1781               |
| ZZO      | 20                  | 0.0330               |
| 4CuZZO   | 13                  | 0.0218               |
| 5CuZZO   | 14                  | 0.0209               |
| 6CuZZO   | 15                  | 0.0224               |
| 7CuZZO   | 15                  | 0.0232               |

**Table S4.** Catalytic performance of methanol route and syngas route.

| Methylation reagent | Catalyst  | Conv. of 1,2,4-TriMB (%) | Selec. (%)      |        | Durene/C <sub>10</sub> (%) |
|---------------------|-----------|--------------------------|-----------------|--------|----------------------------|
|                     |           |                          | C <sub>10</sub> | Durene |                            |
| MeOH                | Z5        | 18.8                     | 35.0            | 22.3   | 76.7                       |
| CO + H <sub>2</sub> | 5CuZZO-Z5 | 19.1                     | 63.7            | 44.6   | 89.9                       |

Reaction conditions:  $T = 320$  °C,  $P = 3.0$  MPa. Methanol as methylation reagent: H<sub>2</sub>/N<sub>2</sub> = 60/40, molar ratio of 1,2,4-TriMB and MeOH = 2/1, and WHSV = 1.3 h<sup>-1</sup>. Syngas as methylation reagent: CO/H<sub>2</sub>/N<sub>2</sub> = 30/60/10, GHSV = 12000 mL g<sup>-1</sup> h<sup>-1</sup>, and 1,2,4-TriMB vaped at 110 °C.

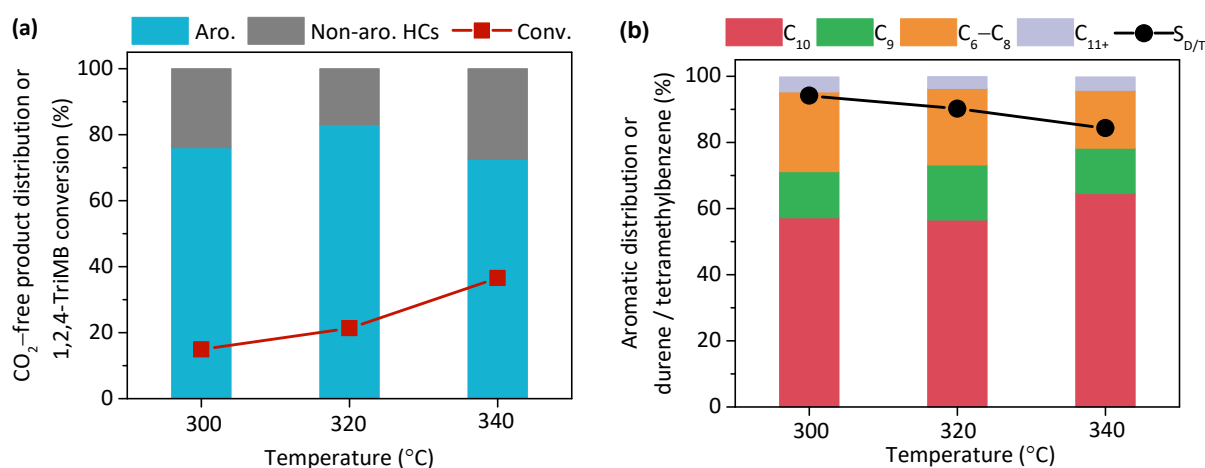

**Fig. S1.** Catalytic performance of 1,2,4-TriMB methylated with syngas in different temperatures. Distribution of (a) CO<sub>2</sub>-free products and (b) aromatics. Catalyst: ZZO-Z5 (mass ratio of 4/6, Zn/Zr molar ratio of 1/7, and Z5 SiO<sub>2</sub>/Al<sub>2</sub>O<sub>3</sub> ratio of 130). Reaction conditions: CO/H<sub>2</sub>/N<sub>2</sub> = 30/60/10,  $P = 3.0$  MPa, GHSV = 12000 mL g<sup>-1</sup> h<sup>-1</sup>, and 1,2,4-TriMB vaped at 110 °C.

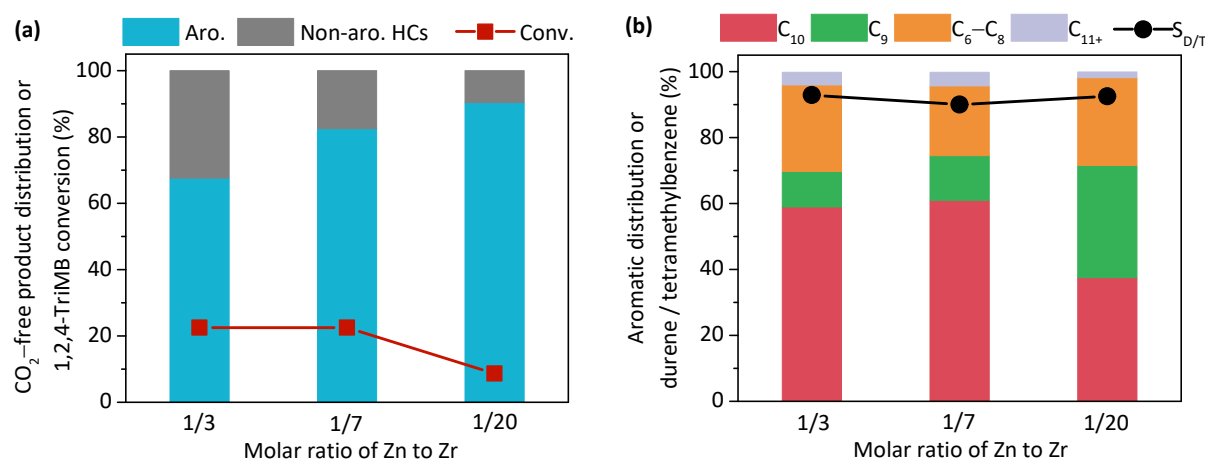

**Fig. S2.** Catalytic performance of 1,2,4-TriMB methylated with syngas in different Zn/Zr molar ratio. Distribution of (a) CO<sub>2</sub>-free products and (b) aromatics. Catalyst: ZZO-Z5 (mass ratio of 4/6, Z5 SiO<sub>2</sub>/Al<sub>2</sub>O<sub>3</sub> ratio of 130). Reaction conditions: CO/H<sub>2</sub>/N<sub>2</sub> = 30/60/10,  $T = 320$  °C,  $P = 3.0$  MPa, GHSV = 12000 mL g<sup>-1</sup> h<sup>-1</sup>, and 1,2,4-TriMB vaped at 110 °C.

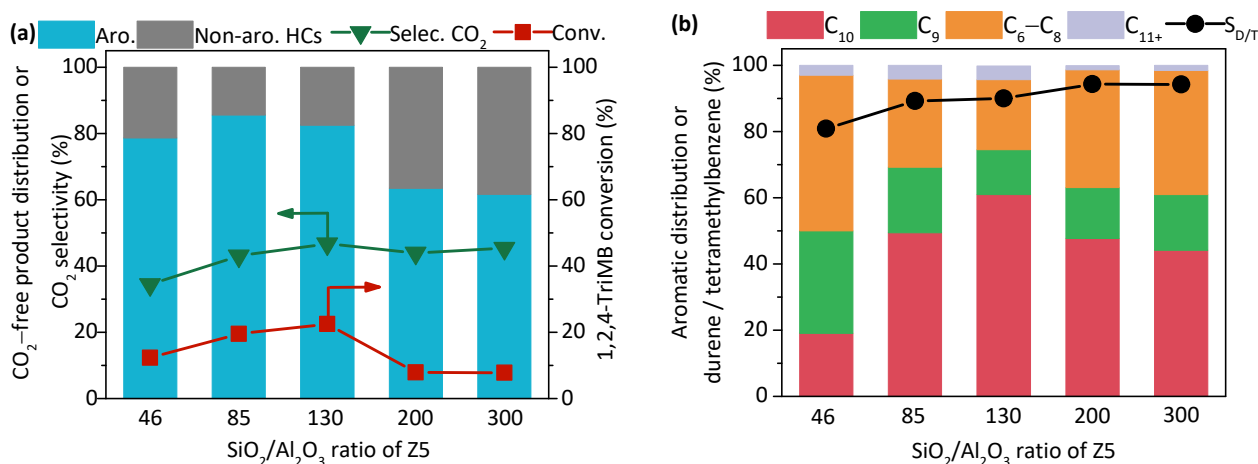

**Fig. S3.** Catalytic performance of 1,2,4-TriMB methylated with syngas in different Z5 SiO<sub>2</sub>/Al<sub>2</sub>O<sub>3</sub> ratio. Distribution of (a) CO<sub>2</sub>-free products and (b) aromatics. Catalyst: ZZO-Z5 (mass ratio of 4/6, Zn/Zr molar ratio of 1/7). Reaction conditions: CO/H<sub>2</sub>/N<sub>2</sub> = 30/60/10,  $T = 320$  °C,  $P = 3.0$  MPa, GHSV = 12000 mL g<sup>-1</sup> h<sup>-1</sup>, and 1,2,4-TriMB vaped at 110 °C.

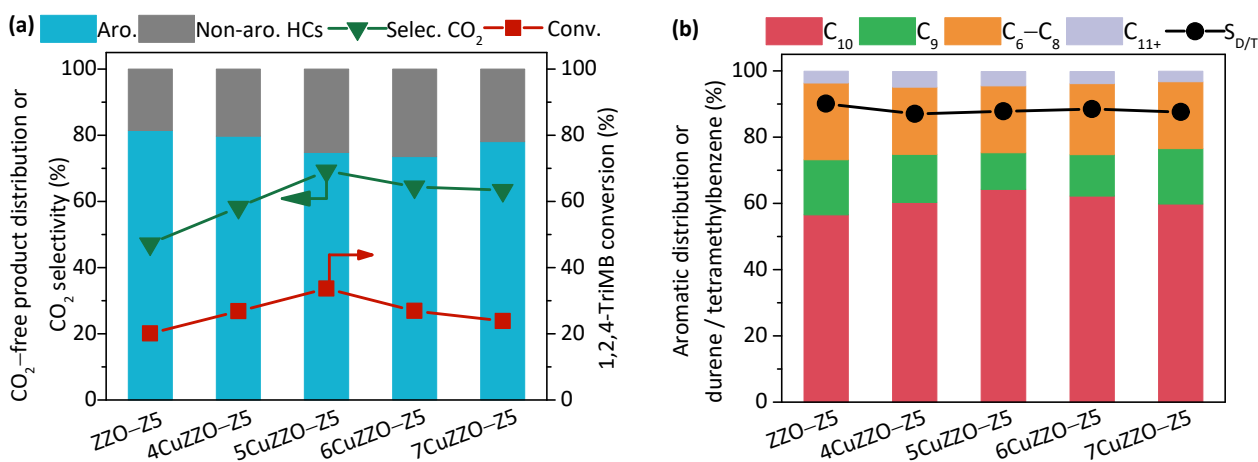

**Fig. S4.** Catalytic performance of 1,2,4-TriMB methylated with syngas in different Cu contents. Distribution of (a) CO<sub>2</sub>-free products and (b) aromatics. Catalyst: Oxides-Z5. Reaction conditions: CO/H<sub>2</sub>/N<sub>2</sub> = 30/60/10,  $T = 320$  °C,  $P = 3.0$  MPa, GHSV = 12000 mL g<sup>-1</sup> h<sup>-1</sup>, and 1,2,4-TriMB vaped at 110 °C. Selec. CO<sub>2</sub>: CO<sub>2</sub> selectivity.

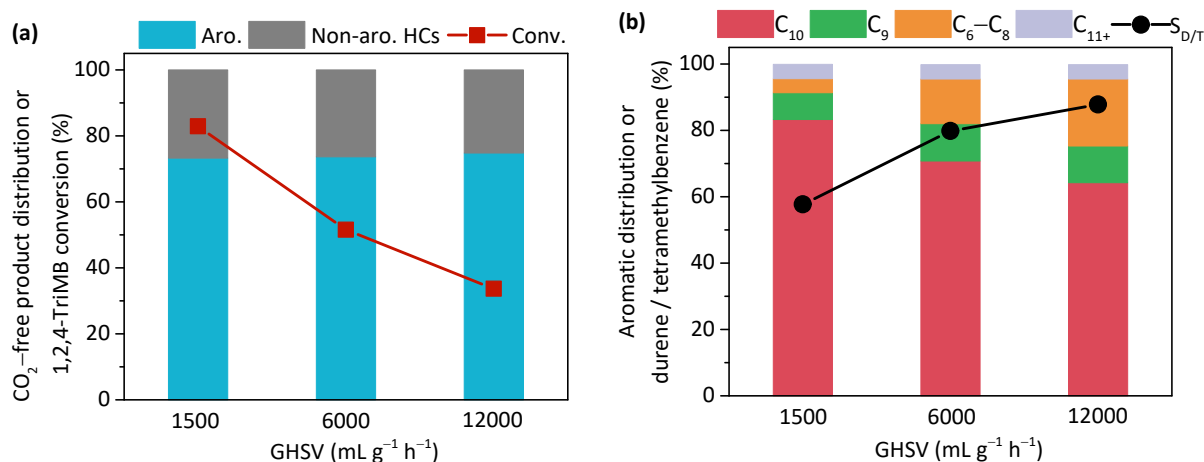

**Fig. S5.** Catalytic performance of 1,2,4-TriMB methylated with syngas in different GHSV. Distribution of (a) CO<sub>2</sub>-free products and (b) aromatics. Catalyst: 5CuZZO-Z5 (mass ratio of 4/6, Z5 SiO<sub>2</sub>/Al<sub>2</sub>O<sub>3</sub> ratio of 130). Reaction conditions: CO/H<sub>2</sub>/N<sub>2</sub> = 30/60/10,  $T = 320$  °C,  $P = 3.0$  MPa, and 1,2,4-TriMB vaped at 110 °C.

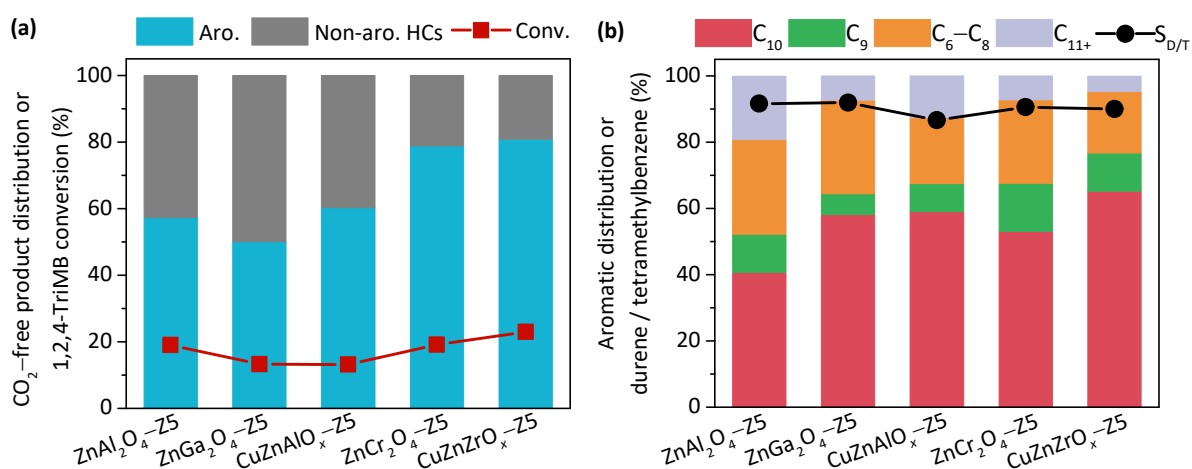

**Fig. S6.** Catalytic performance of 1,2,4-TriMB methylated with syngas in different catalysts. Distribution of (a) CO<sub>2</sub>-free products and (b) aromatics. Catalyst: Oxides-Z5 (mass ratio of 4/6, and Z5 SiO<sub>2</sub>/Al<sub>2</sub>O<sub>3</sub> ratio of 130). Reaction conditions: CO/H<sub>2</sub>/N<sub>2</sub> = 30/60/10,  $T = 290$  °C,  $P = 3.0$  MPa, GHSV = 12000 mL g<sup>-1</sup> h<sup>-1</sup>, and 1,2,4-TriMB vaped at 110 °C.

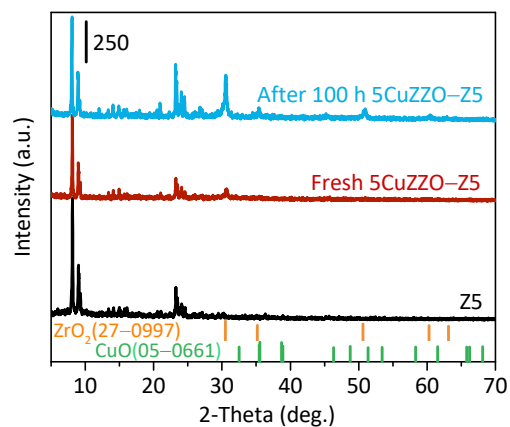

**Fig. S7.** XRD pattern of Z5 and 5CuZZO-Z5 which are fresh and after 100 h reaction, respectively.

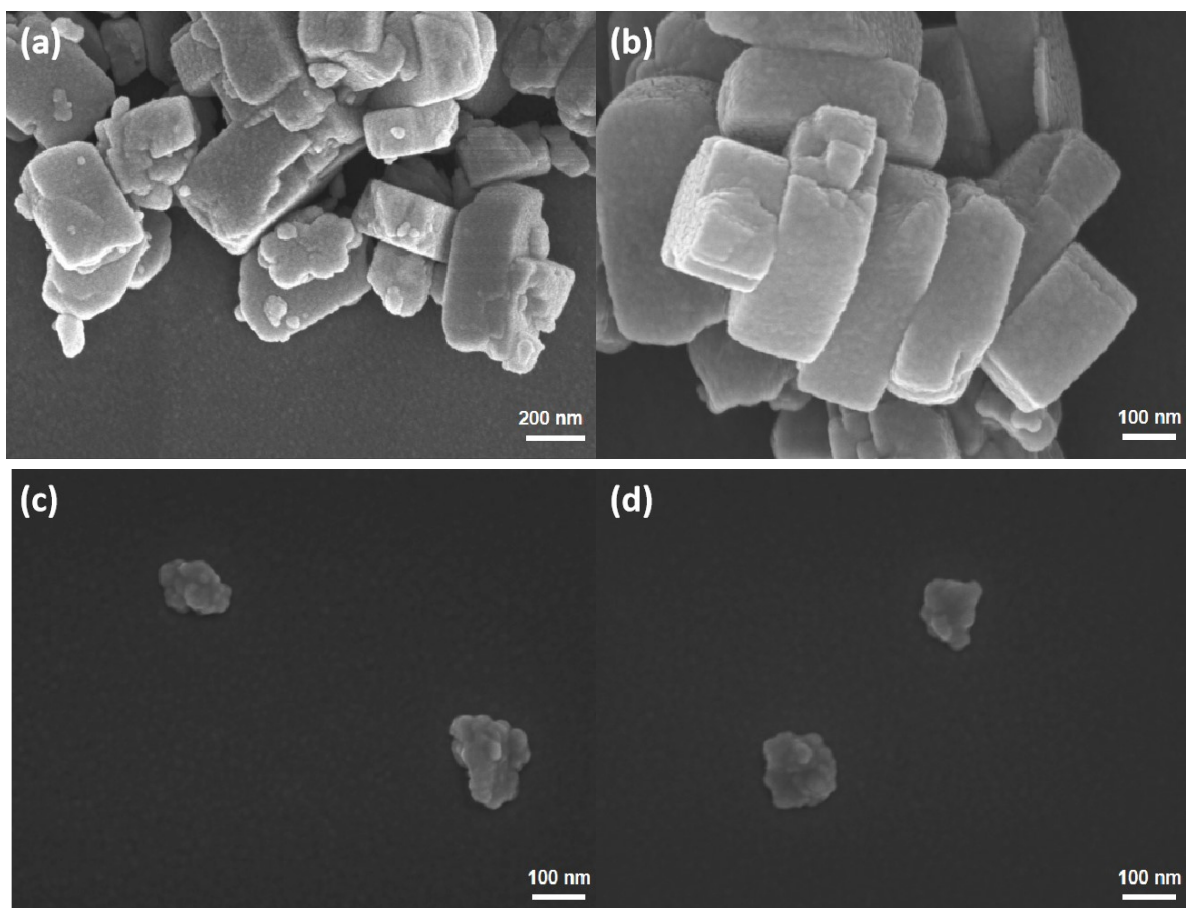

**Fig. S8.** SEM images of (a) ZZO-Z5, (b) Z5, (c) ZZO, and (d) 5CuZZO.

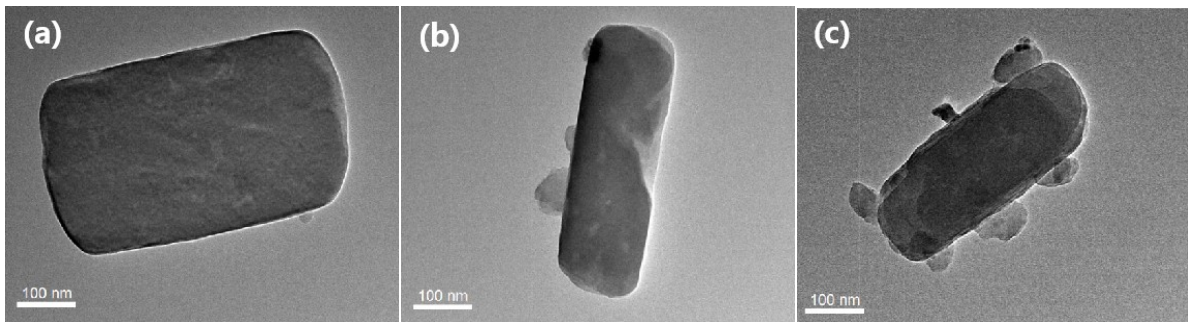

**Fig. S9.** TEM images of (a) Z5, (b) ZZO-Z5, and (c) 5CuZZO-Z5.

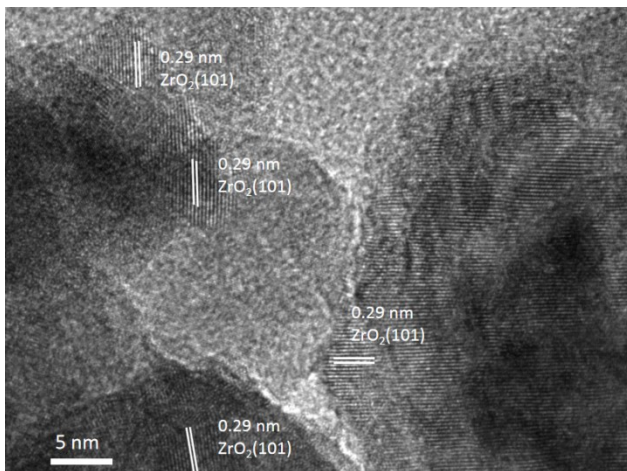

**Fig. S10.** HR-TEM image of ZZO-Z5.



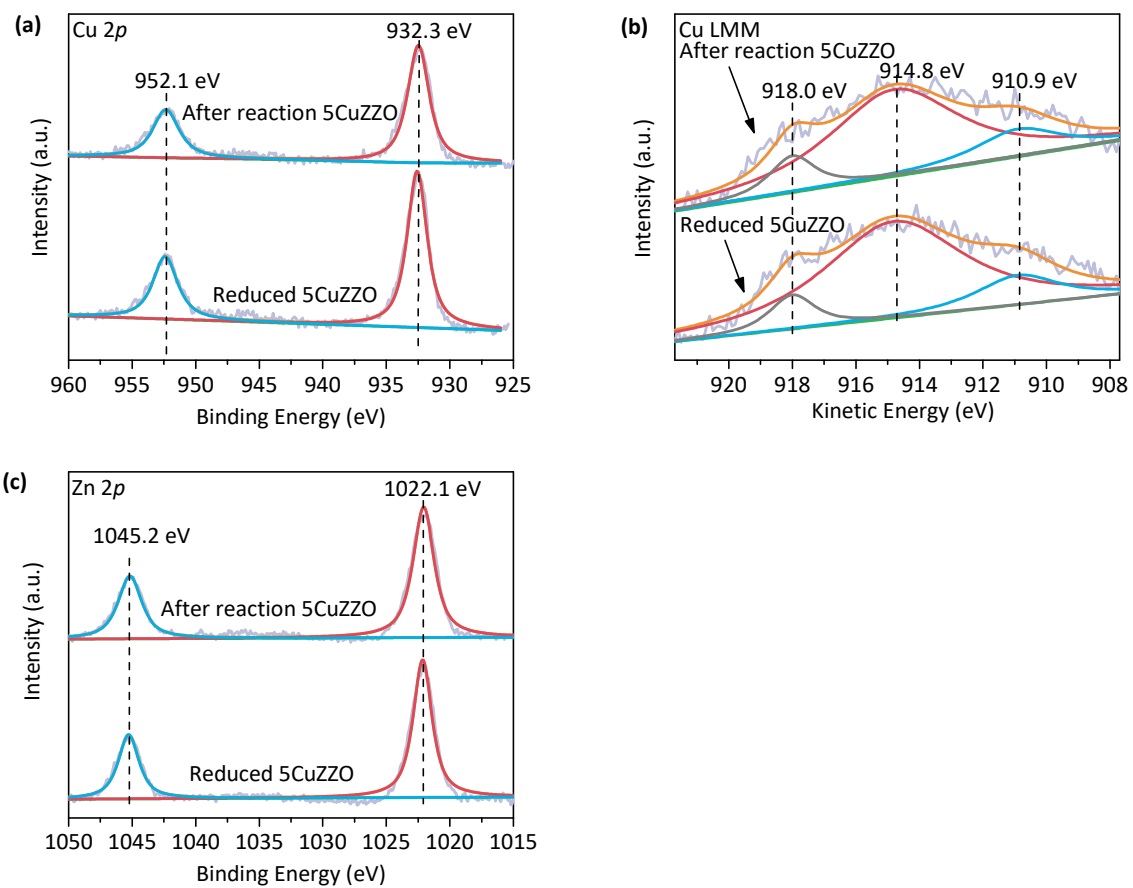

**Fig. S11.** In situ XPS–AES spectra of (a) Cu 2*p*, (b) Cu LMM, and (c) Zn 2*p* for after 15 h reaction and reduced 5CuZZO.
